# Supplementary material for: The valence electronic structure and conformational flexibility of epichlorohydrin
Source: Royal Society of Chemistry journal article supplement (doi:10.1039/c0cp02730h), 2011-01-01
Supplement: c0cp02730h.pdf [file c0cp02730h.pdf]

Supplementary Material (ESI) for PCCP  
This journal is © the Owner Societies 2011

# Valence electronic structure and conformational flexibility of Epichlorohydrin

*S. Stranges,<sup>\*a,b</sup> M. Alagia,<sup>b</sup> P. Decleva,<sup>\*c</sup> M. Stener,<sup>c</sup> G. Fronzoni,<sup>c</sup> D. Toffoli,<sup>d</sup> M. Speranza,<sup>e</sup> D. Catone,<sup>f</sup> S. Turchini,<sup>f</sup> T. Prosperi,<sup>f</sup> N. Zema,<sup>f</sup> G. Contini,<sup>f</sup> and Y. Keheyang<sup>g</sup>*

<sup>a</sup> *Department of Chemistry, University of La Sapienza, P.le A. Moro 5, Rome, I-00185, Italy*

<sup>b</sup> *IOM-CNR TASC Laboratory, Area Science Park, Basovizza S.S. 14 Km 163.5, I-34149 Trieste, Italy*

<sup>c</sup> *Dipartimento di Scienze Chimiche, Università di Trieste, Via L. Giorgieri I-34149 Trieste, Italy, and IOM-CNR DEMOCRITOS, Trieste, Italy*

<sup>d</sup> *Department of Chemistry, Middle East Technical University, 06531 Ankara, Turkey*

<sup>e</sup> *Dipartimento di Chimica e Tecnologia del Farmaco, Università La Sapienza, P.le A. Moro 5, I-00185 Rome, Italy*

<sup>f</sup> *ISM-CNR, Via Del Fosso del Cavaliere 100, I-00133, Rome, Italy*

<sup>g</sup> *ISMN-CNR, c/o Department of Chemistry, University of La Sapienza, P.le A. Moro 5, Rome, I-00185, Italy*

**\*CORRESPONDING AUTHORS:**

Stefano Stranges, Department of Chemistry, La Sapienza University, I-00185 Rome, Italy (tel +39 0649913362, fax +39 06490324, email: stefano.stranges@uniroma1.it);

Piero Decleva, Dipartimento di Scienze Chimiche, Università di Trieste, Via L. Giorgieri 1, I-34149 Trieste, Italy (email: decleva@univ.trieste.it)

Contents:

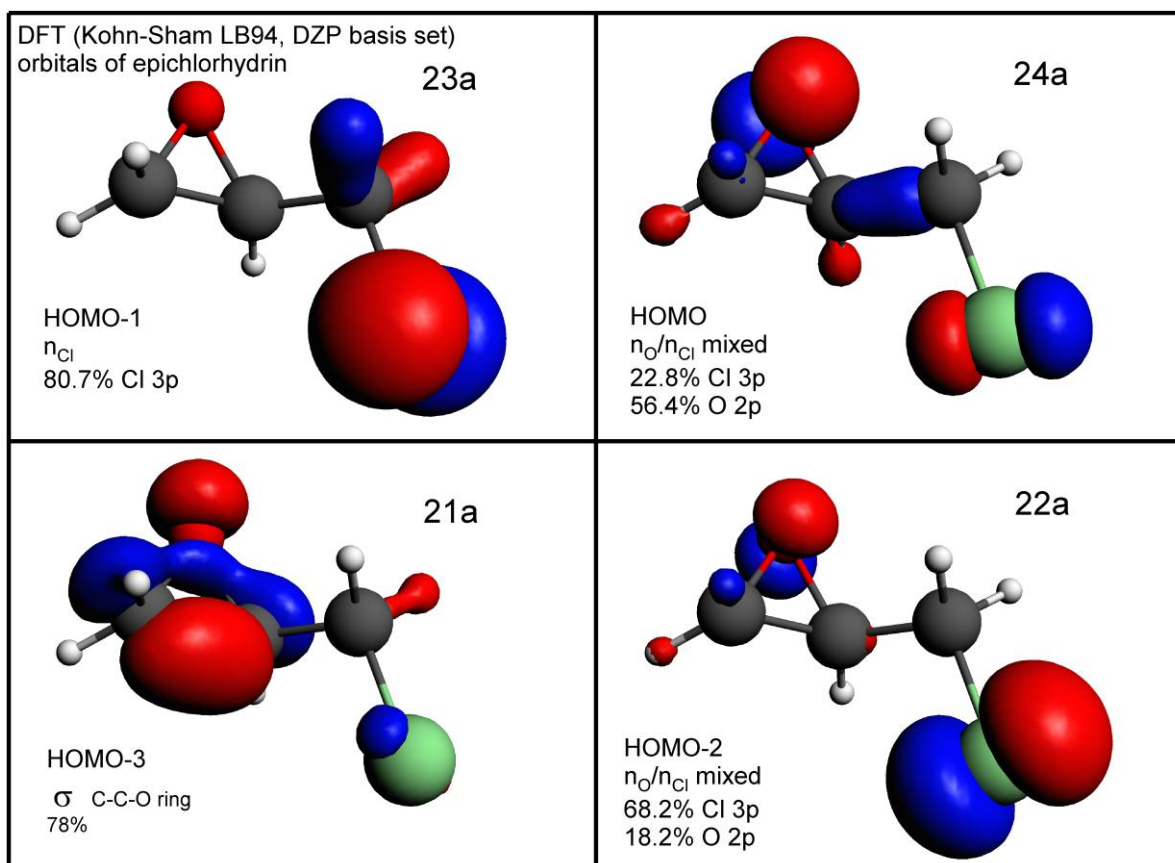

**Caption:** Pictures of the four outermost Kohn-Shan DFT MOs with their main character, in terms of AO contributions, for the *gauche-II* conformer of epichlorohydrin.
